# Supplementary material for: Physical and chemical quenching rates and their influence on stereoselective photooxygenation of oxazolidinone-functionalized enecarbamates
Source: Royal Society of Chemistry journal article supplement (doi:10.1039/b903848e), 2009-03-24
Supplement: b903848e.pdf [file b903848e.pdf]

**Electronic Supplementary Information**  
**Role of Vibrational Deactivation in the Stereoselective Photooxygenation of**  
**Oxazolidinone-functionalized Enecarbamates**

Marissa Solomon<sup>a</sup>, J. Sivaguru<sup>b</sup>, Steffen Jockusch<sup>a</sup>, Waldemar Adam<sup>c</sup>, Nicholas J. Turro<sup>a</sup>

<sup>[a]</sup>*Department of Chemistry, Columbia University, 3000 Broadway  
New York, NY 10027, USA*

<sup>[b]</sup>*Department of Chemistry and Molecular Biology, North Dakota State University, Fargo, ND 58105, USA*

<sup>[c]</sup>*The Department of Chemistry, University of Puerto Rico, Facundo Bueso 110, Rio Piedras, PR 00931*

## **1) General**

*Trans*-4-octene was obtained from Alfa Aesar and 1-methyl-1-cyclohexene from Aldrich. Both compounds were distilled before use. Hexamethyldisilane (HMDS) and 5,10,15,20-tetrakis(pentafluorophenyl)porphyrin (TFPP) were used as received from Aldrich. 1,4-Dimethylnaphthalene endoperoxide was synthesized following established procedures.<sup>S1</sup> Deuterated solvents were obtained from Cambridge Isotope Laboratories and kept over dry NaHCO<sub>3</sub>. The *Z* and *E* enecarbamates were synthesized as previously described.<sup>S2</sup> <sup>1</sup>H-NMR spectra were obtained using 400MHz Bruker NMR instrument.

## **2) Reaction Procedures**

### ***a) Exemplar procedure for competitive kinetics to determine $k_{cq}$ :***

Stock solution of HMDS [0.35ml to 25ml with CDCl<sub>3</sub>], TFPP [5.26mg to 10ml with CDCl<sub>3</sub>], *trans*-4-octene [ **Stock 1**: 0.15ml to 5ml with CDCl<sub>3</sub>; **Stock 2**: 0.2ml Stock 1 diluted to 5ml with CDCl<sub>3</sub>] and enecarbamate [147.2mg to 25 ml with CDCl<sub>3</sub>] were made up. Using the stock solutions, 0.45 ml of the enecarbamate, 0.1ml *trans*-4-octene and 0.05ml TFPP were added to NMR tube. Oxygen was bubbled into samples and they were irradiated under ambient conditions using a 300W halogen lamp and a <400 nm cutoff filter. Low conversions (<20%) were maintained. After irradiation, 0.1ml of HMDS stock solution was added and the sample characterized using <sup>1</sup>H-NMR. Chemical quenching rates were calculated based on the disappearance of enecarbamate and *trans*-4-octene peaks and therefore the HMDS was used as a standard to calculate the amount of enecarbamate remaining after irradiation.

In later experiments **1a** was used as a standard in addition to *trans*-4-octene.

***b) General procedure for  $^1\text{O}_2$  chemiluminescence quenching experiment to determine  $k_q$ :***

All compounds were purified, dried and pumped for several days under vacuum at ambient temperature. Stock solutions of enecarbamate quenchers, 1-methyl-1-cyclohexene (0.05M), *trans*-4-octene (0.4M) and 1,4-dimethylnaphthalene endoperoxide (10mM) were prepared. In a quartz cuvette (1×1×4 cm) with 200μl of 1,4-dimethylnaphthalene endoperoxide solution in 2700μl  $\text{CDCl}_3$ , aliquots of quencher (enecarbamate or standard) were added. After the addition of each aliquot chemiluminescence spectra were recorded from 1200 to 1340nm at 22°C using a modified Fluorolog 2 spectrofluorimeter (Horiba Jobin-Yvon) in conjunction with a NIR sensitive photomultiplier detector (H9170-45, Hamamatsu) (Figure S3). Stern-Volmer constants ( $K_{SV}$ ) were determined from the slope of the plot of the  $^1\text{O}_2$  phosphorescence intensity vs quencher concentration (Figure S4). To convert  $K_{SV}$  into the total quenching rate constant ( $k_q$ ) using Eqn S1, the singlet oxygen lifetime in the absence of quencher ( $\tau_0$ ) is required. Because  $\tau_0$  under our experimental condition is expected to be shorter than the published value in high purity  $\text{CDCl}_3$ , we determined  $\tau_0$  using *trans*-4-octene as standard ( $k_q = 1.8 \times 10^4 \text{ M}^{-1}\text{s}^{-1}$ ).<sup>S3</sup>

$$K_{SV} = k_q \tau_0 \quad (\text{S1})$$

### 3) $^1\text{H}$ -NMR spectra for Competitive Kinetics:

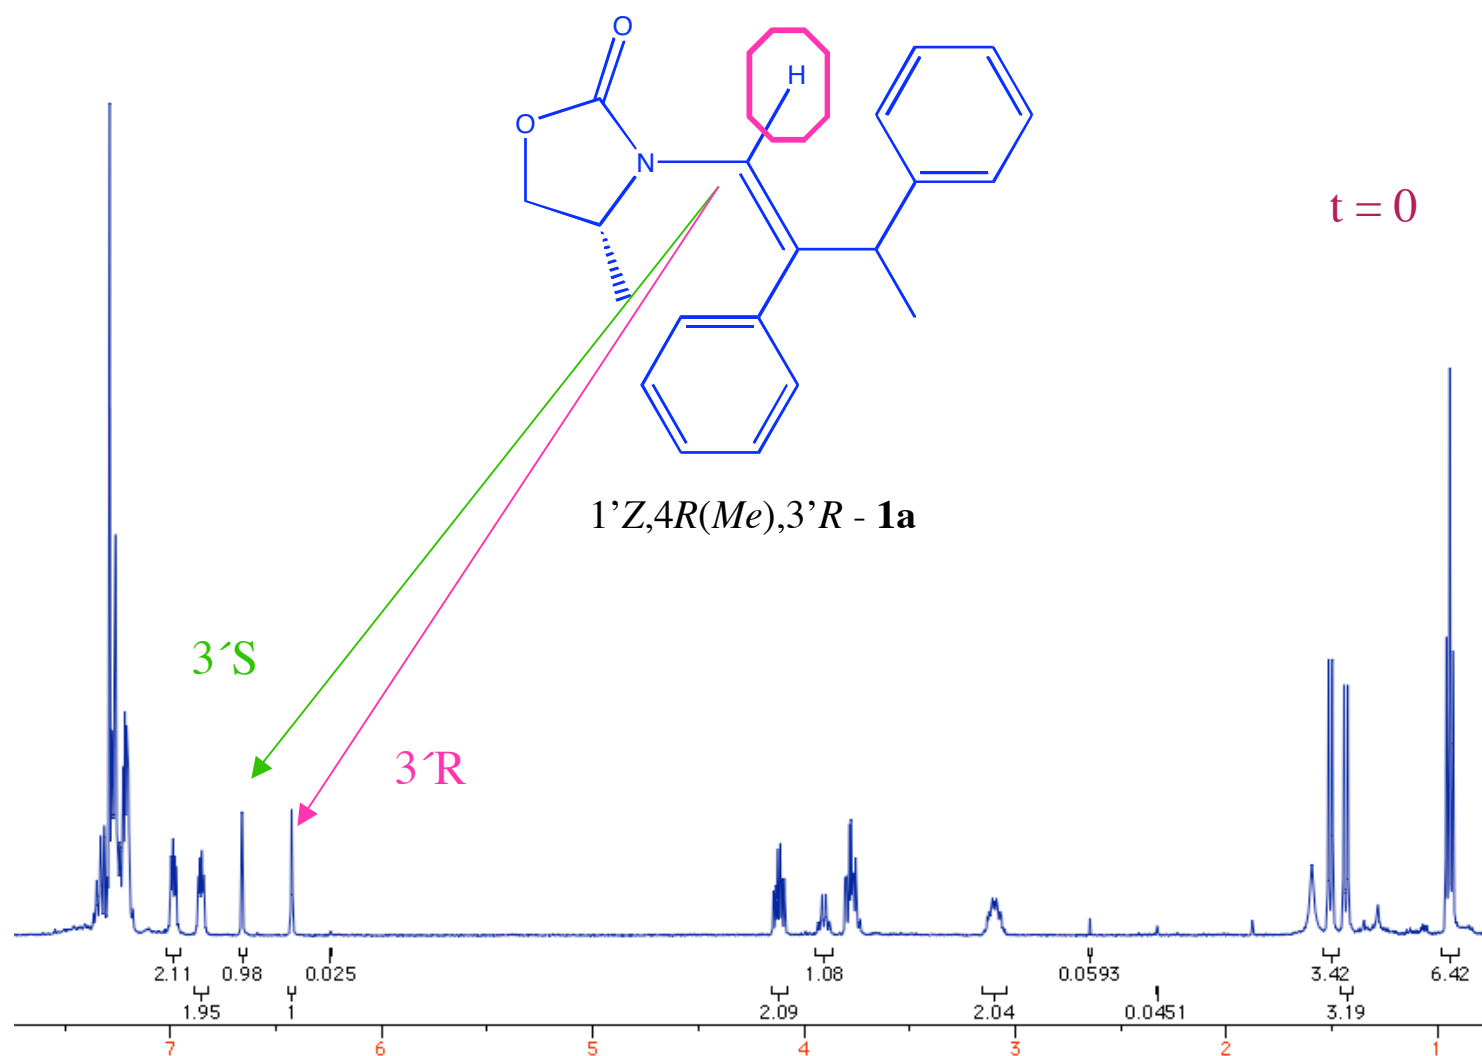

**Figure S1:**  $^1\text{H}$  NMR spectrum of the enecarbamate standard **1a** before irradiation. The disappearance of the enecarbamate was monitored mainly with the vinylic hydrogen peaks.

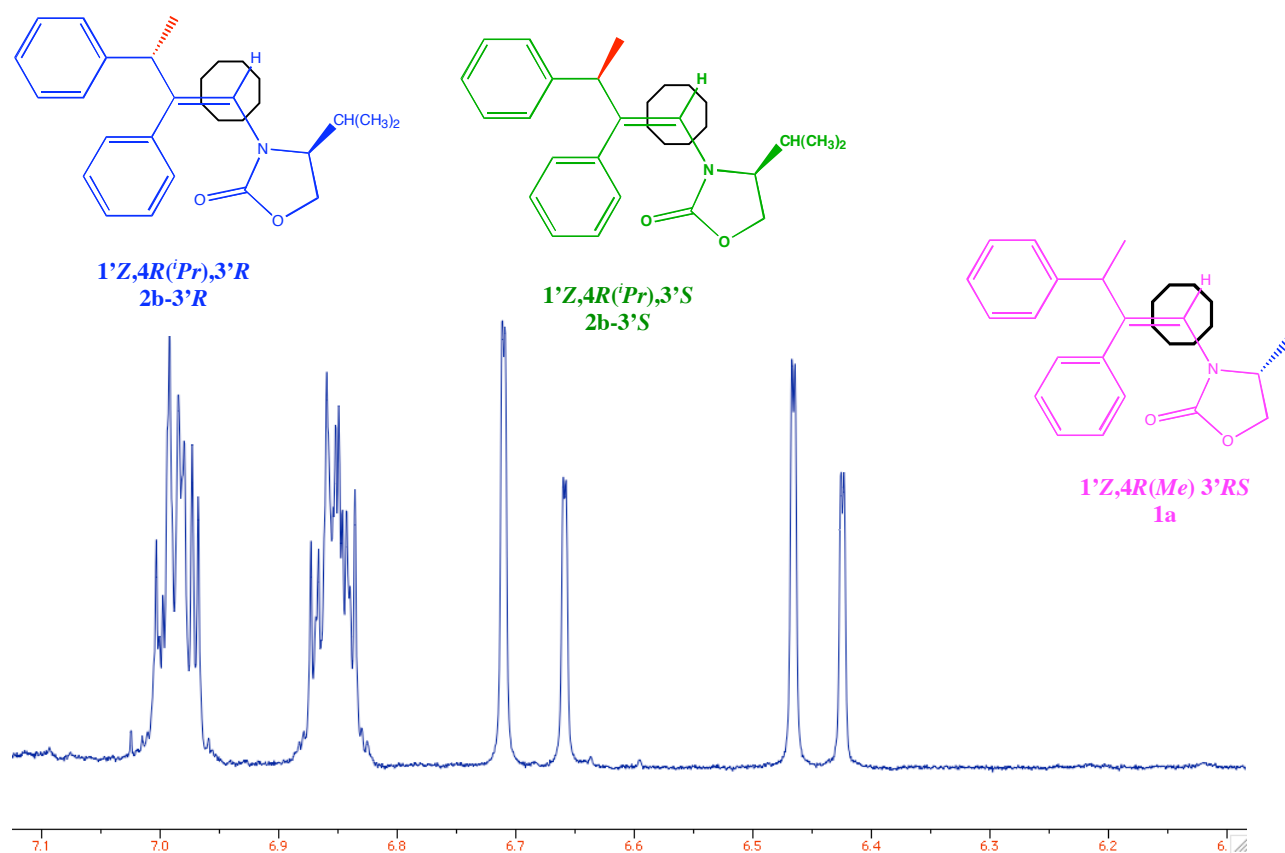

**Figure S2:**  $^1\text{H}$  NMR spectra of enecarbamates **1a** (standard) and **2b** before irradiation.

**4) Stern-Volmer Quenching to determine the Total Quenching Rate Constants ( $k_q$ ):**

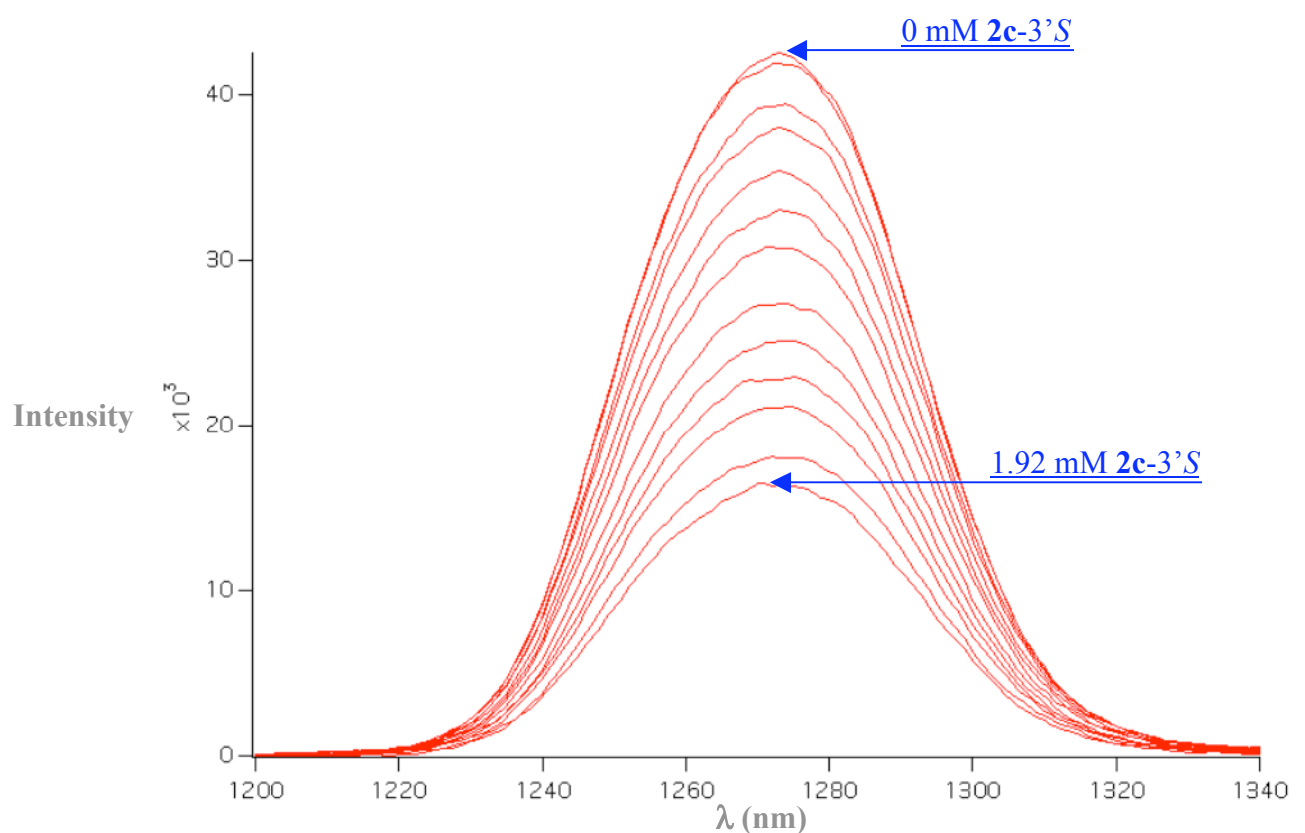

**Figure S3:** Chemiluminescence (phosphorescence) spectra of singlet oxygen generated by decomposition of 1,4-dimethylnaphthalene endoperoxide (22 °C) in the presence of varying concentrations of **2c-3'S**.

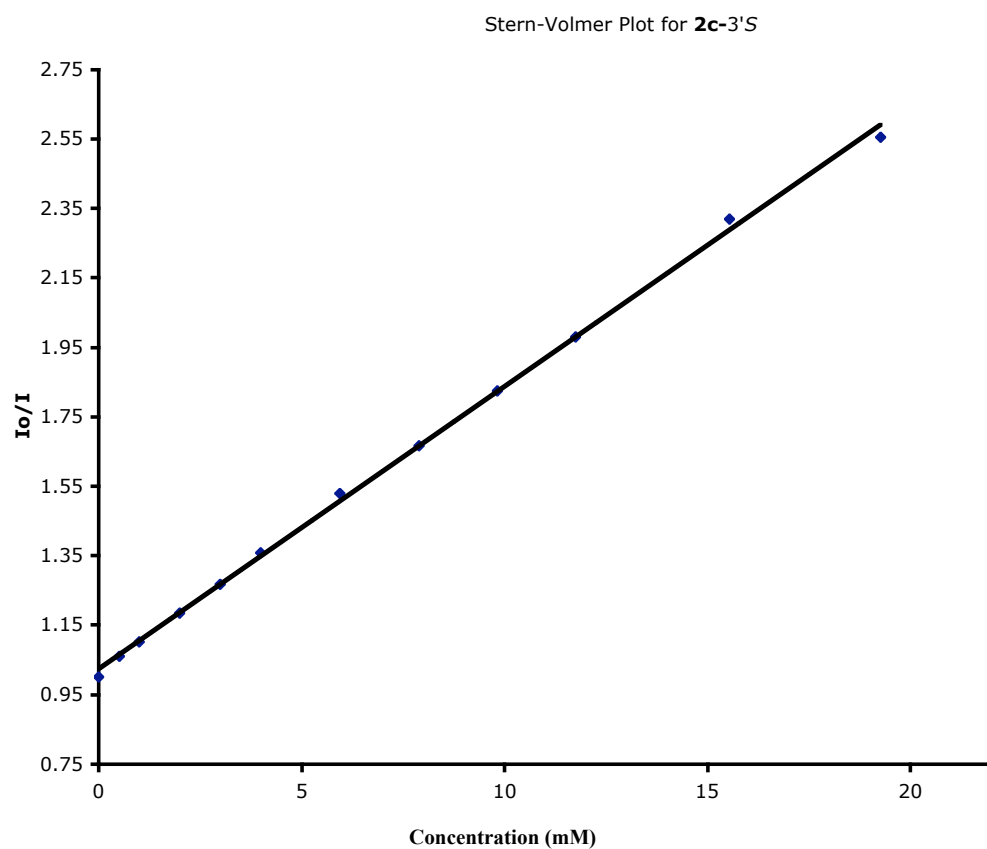

**Figure S4:** Stern-Volmer plot for **2c**-3'S using data obtained in Figure S3.

**5) Enantioselectivities as a function of C-4 alkyl group (15°C, CDCl<sub>3</sub>):<sup>S4-7</sup>**

$$s = \frac{k_{cq}^{3'R}}{k_{cq}^{3'S}} = \frac{\ln[1 - C(1 + ee_{MDB})]}{\ln[1 - C(1 - ee_{MDB})]} \quad (\text{S2})$$

**Table S1**

| Entry | Substrate <sup>a</sup>                     | Configuration |            | <i>s</i> <sup>a</sup> | <i>s</i> <sup>b</sup> |
|-------|--------------------------------------------|---------------|------------|-----------------------|-----------------------|
|       |                                            | C-4           | C-3'       | 15°C                  | 20°C                  |
| 1.    | <i>Z</i> ( <i>Me</i> )- <b>1a</b>          | <i>R</i>      | <i>R/S</i> | 1.2 [ <i>R</i> ]      | 1.3 [ <i>R</i> ]      |
| 2.    | <i>Z</i> ( <i>Me</i> )- <b>1b</b>          | <i>S</i>      | <i>R/S</i> | 0.7 [ <i>S</i> ]      |                       |
| 3.    | <i>E</i> ( <i>Me</i> )- <b>1c</b>          | <i>R</i>      | <i>R/S</i> | 9.1 [ <i>R</i> ]      |                       |
| 4.    | <i>E</i> ( <i>Me</i> )- <b>1d</b>          | <i>S</i>      | <i>R/S</i> | 0.1 [ <i>S</i> ]      | 0.5 [ <i>S</i> ]      |
| 5.    | <i>Z</i> ( <i>i</i> <i>Pr</i> )- <b>2a</b> | <i>R</i>      | <i>R/S</i> | 2.2 [ <i>R</i> ]      | 1.2 [ <i>R</i> ]      |
| 6.    | <i>Z</i> ( <i>i</i> <i>Pr</i> )- <b>2b</b> | <i>S</i>      | <i>R/S</i> | 0.7 [ <i>S</i> ]      | 0.8 [ <i>S</i> ]      |
| 7.    | <i>E</i> ( <i>i</i> <i>Pr</i> )- <b>2c</b> | <i>R</i>      | <i>R/S</i> | 5.0 [ <i>R</i> ]      | 1.8 [ <i>R</i> ]      |
| 8.    | <i>E</i> ( <i>i</i> <i>Pr</i> )- <b>2d</b> | <i>S</i>      | <i>R/S</i> | 0.3 [ <i>S</i> ]      | 0.6 [ <i>S</i> ]      |
| 9.    | <i>Z</i> ( <i>t</i> <i>Bu</i> )- <b>6b</b> | <i>S</i>      | <i>R/S</i> | 0.7 [ <i>R</i> ]      |                       |
| 10.   | <i>E</i> ( <i>t</i> <i>Bu</i> )- <b>6d</b> | <i>S</i>      | <i>R/S</i> | 0.3 [ <i>S</i> ]      |                       |

The *s*<sup>a</sup> calculated using *ee*<sub>mdb</sub> and *C*, *s*<sup>b</sup> calculated using *k*<sub>cq</sub> values in Table S2.

The stereoselectivity (*s*) factor<sup>S8</sup> is a ratio of the relative reactive rate constants (chemical quenching) between two epimers that only differ in the *R/S* configuration at the C-3' center (Eqn S2). In previous work (Table S1)<sup>S5,S9</sup> the *s*-factor (*s*<sup>a</sup>) was determined as only a ratio via the enantioselectivity in the MDB product (*ee*<sub>MDB</sub>) and *C*, the conversion (Eqn S2). While *ee* may change with conversion, the *s*-factor is conversion independent and is a way of comparing different compounds where the *ee* has been determined over different conversion. However, the *s*-factors can also be computed (Eqn S2) from *k*<sub>cq</sub> values shown in Table S2 (*s*<sup>b</sup>) and compared to the *s*-factors in Table S1. The difference

in the  $s^a$  and  $s^b$  values can be attributed to the two sets of experiments being conducted at different temperatures (Table S3) and different concentrations.

**Table S2**

| Entry | Substrate <sup>a</sup>               | Configuration |          | Chemical Quenching[M <sup>-1</sup> s <sup>-1</sup> ]<br>( $k_{\text{cq}} \times 10^{-3}$ ) |
|-------|--------------------------------------|---------------|----------|--------------------------------------------------------------------------------------------|
|       |                                      | C-4           | C-3'     |                                                                                            |
| 1.    | <i>Z(Me)</i> - <b>1a</b>             | <i>R</i>      | <i>R</i> | 2.4                                                                                        |
| 2.    | <i>Z(Me)</i> - <b>1a</b>             | <i>R</i>      | <i>S</i> | 1.8                                                                                        |
| 3.    | <i>E(Me)</i> - <b>1d</b>             | <i>S</i>      | <i>R</i> | 0.9                                                                                        |
| 4.    | <i>E(Me)</i> - <b>1d</b>             | <i>S</i>      | <i>S</i> | 1.9                                                                                        |
| 5.    | <i>Z(<sup>i</sup>Pr)</i> - <b>2a</b> | <i>R</i>      | <i>R</i> | 1.6                                                                                        |
| 6.    | <i>Z(<sup>i</sup>Pr)</i> - <b>2a</b> | <i>R</i>      | <i>S</i> | 1.3                                                                                        |
| 7.    | <i>Z(<sup>i</sup>Pr)</i> - <b>2b</b> | <i>S</i>      | <i>R</i> | 1.3                                                                                        |
| 8.    | <i>Z(<sup>i</sup>Pr)</i> - <b>2b</b> | <i>S</i>      | <i>S</i> | 1.6                                                                                        |
| 9.    | <i>E(<sup>i</sup>Pr)</i> - <b>2c</b> | <i>R</i>      | <i>R</i> | 1.6                                                                                        |
| 10.   | <i>E(<sup>i</sup>Pr)</i> - <b>2c</b> | <i>R</i>      | <i>S</i> | 0.9                                                                                        |
| 11.   | <i>E(<sup>i</sup>Pr)</i> - <b>2d</b> | <i>S</i>      | <i>R</i> | 1.0                                                                                        |
| 12.   | <i>E(<sup>i</sup>Pr)</i> - <b>2d</b> | <i>S</i>      | <i>S</i> | 1.7                                                                                        |

**Table S3** – Determination of *s*-factor for **2c** upon photooxygenation in CDCl<sub>3</sub>

| Entry | Temp <sup>a</sup><br>°C           | % ee <sub>MDB</sub> | % <i>C</i> | <i>s</i> <sup>a</sup> |
|-------|-----------------------------------|---------------------|------------|-----------------------|
| 1.    | <i>Z</i> ( <i>Me</i> )- <b>1a</b> | 8 [ <i>S</i> ]      | 5          | 1.2                   |
| 2.    | <i>Z</i> ( <i>Me</i> )- <b>1b</b> | 63 [ <i>R</i> ]     | 17         | 5.0                   |
| 3.    | <i>E</i> ( <i>Me</i> )- <b>1c</b> | 78 [ <i>R</i> ]     | 37         | 13.0                  |
| 4.    | <i>E</i> ( <i>Me</i> )- <b>1d</b> | 88 [ <i>R</i> ]     | 43         | 31.0                  |

## 6) Structure Matrix:

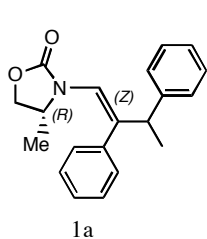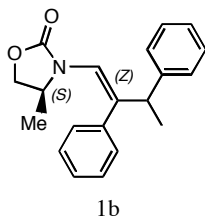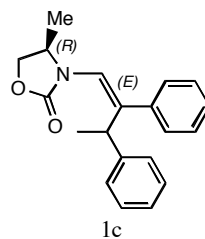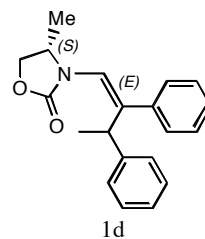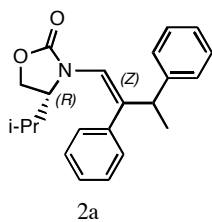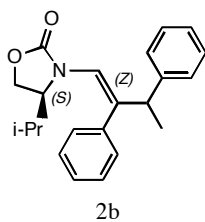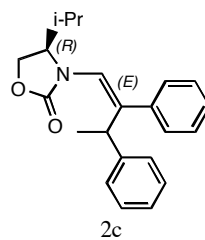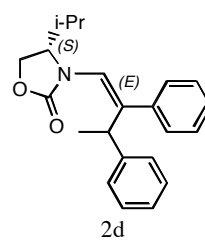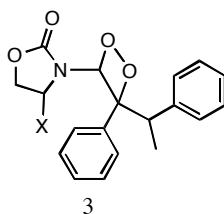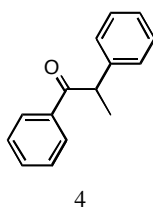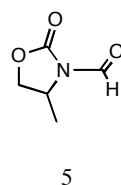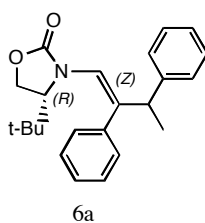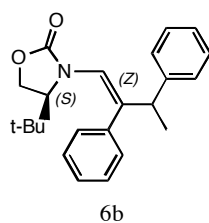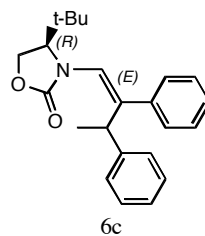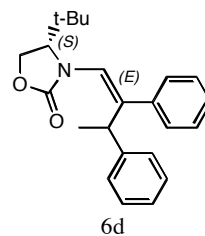

## 7) References:

- S1. Ben-Shabat, S.; Itagaki, Y.; Jockusch, S.; Sparrow, J. R.; Turro, N. J.; Nakanishi, K., Formation of a nonaoxirane from A2E, a lipofuscin fluorophore related to macular degeneration, and evidence of singlet oxygen involvement. *Angew. Chem., Int. Ed.* **2002**, *41*, 814-817.
- S2. Adam, W.; Bosio, S. G.; Turro, N. J.; Wolff, B. T., Enecarbamates as Selective Substrates in Oxidations: Chiral-Auxiliary-Controlled Mode Selectivity and Diastereoselectivity in the [2+2] Cycloaddition and Ene Reaction of Singlet Oxygen and in the Epoxidation by DMD and mCPBA. *J. Org. Chem.* **2004**, *69*, 1704-1715.
- S3. Tanielian, C.; Mechin, R., Interaction of singlet molecular oxygen with disubstituted olefins. Evidence for a physical quenching induced by the hydrocarbon chain. *J. Phys. Chem.* **1988**, *92*, 265-267.
- S4. Sivaguru, J.; Solomon, M. R.; Poon, T.; Jockusch, S.; Bosio, S. G.; Adam, W.; Turro, N. J., The Reaction of Singlet Oxygen with Enecarbamates: A Mechanistic Playground for Investigating Chemoselectivity, Stereoselectivity, and Vibratoselectivity of Photooxidations. *Acc. Chem. Res.* **2008**, *41*, 387-400.
- S5. Sivaguru, J.; Solomon, M. R.; Saito, H.; Poon, T.; Jockusch, S.; Adam, W.; Inoue, Y.; Turro, N. J., Conformationally controlled (entropy effects), stereoselective vibrational quenching of singlet oxygen in the oxidative cleavage of oxazolidinone-functionalized enecarbamates through solvent and temperature variations. *Tetrahedron* **2006**, *62*, 6707-6717.
- S6. Poon, T.; Sivaguru, J.; Franz, R.; Jockusch, S.; Martinez, C.; Washington, I.; Adam, W.; Inoue, Y.; Turro, N. J., Temperature and Solvent Control of the Stereoselectivity in the Reactions of Singlet Oxygen with Oxazolidinone-Substituted Enecarbamates. *J. Am. Chem. Soc.* **2004**, *126*, 10498-10499.
- S7. Includes previously unpublished data.
- S8. Kagan, H. B.; Fiaud, J. C., Kinetic resolution. *Top. Stereochem.* **1988**, *18*, 249-330.
- S9. Poon, T.; Turro, N. J.; Chapman, J.; Lakshminarasimhan, P.; Lei, X.; Jockusch, S.; Franz, R.; Washington, I.; Adam, W.; Bosio, S. G., Stereochemical Features of the Physical and Chemical Interactions of Singlet Oxygen with Enecarbamates. *Org. Lett.* **2003**, *5*, 4951-4953.
